# Supplementary material for: Fungal siderophore biosynthesis catalysed by an iterative nonribosomal peptide synthetase
Source: Royal Society of Chemistry journal article supplement (doi:10.1039/d0sc03627g), 2020-01-01
Supplement: d0sc03627g1.pdf [file d0sc03627g1.pdf]

## Supporting Information

### **Fungal siderophore biosynthesis catalysed by an iterative nonribosomal peptide synthetase**

Yang Hai,<sup>1‡</sup> Matthew Jenner,<sup>\*3,4</sup> and Yi Tang<sup>\*1,2</sup>

<sup>1</sup>Department of Chemical and Biomolecular Engineering and <sup>2</sup>Department of Chemistry and Biochemistry, University of California, Los Angeles, California 90095, United States. <sup>3</sup>Department of Chemistry, University of Warwick, Coventry, UK. <sup>4</sup>Warwick Integrative Synthetic Biology (WISB) Centre, University of Warwick, Coventry, UK.

<sup>‡</sup>Present address: Department of Chemistry and Biochemistry, University of California, Santa Barbara, Santa Barbara, California, 93106, United States.

\*Correspondence: [m.jenner@warwick.ac.uk](mailto:m.jenner@warwick.ac.uk), [yitang@ucla.edu](mailto:yitang@ucla.edu)

## Table of Contents

|             |                                                                                                                                                                        |    |
|-------------|------------------------------------------------------------------------------------------------------------------------------------------------------------------------|----|
| 1.          | Materials and Methods .....                                                                                                                                            | 4  |
| 1.1.        | Chemicals and general methods.....                                                                                                                                     | 4  |
| 1.2.        | Protein heterologous expression and purification.....                                                                                                                  | 4  |
| 1.3.        | Genetic manipulation .....                                                                                                                                             | 5  |
| 1.4.        | Siderophore isolation and amino acid substrate preparation .....                                                                                                       | 5  |
| 1.5.        | Biochemical characterization of SidD <i>in vitro</i> .....                                                                                                             | 5  |
| 1.6.        | UHPLC-ESI-Q-TOF-MS analysis of intact proteins .....                                                                                                                   | 6  |
| 2.          | Figures.....                                                                                                                                                           | 7  |
| Figure S1.  | SDS-PAGE analysis of purified SidD and related variants used in this study. ....                                                                                       | 7  |
| Figure S2.  | Mass spectrum of FSC (1) from LC-MS analysis of SidD <i>in vitro</i> reaction. ....                                                                                    | 8  |
| Figure S3.  | Mass spectrum of Fe-FSC Fe-(1) from LC-MS analysis of SidD <i>in vitro</i> reaction.....                                                                               | 8  |
| Figure S4.  | Mass spectrum of Linear-FSC (3) from LC-MS analysis of SidD <i>in vitro</i> reaction.....                                                                              | 9  |
| Figure S5.  | Mass spectrum of Linear-Fe-FSC Fe-(3) from LC-MS analysis of SidD <i>in vitro</i> reaction. ....                                                                       | 9  |
| Figure S6.  | Mass spectrum of tetra- <i>cis</i> -AMHO (4) from LC-MS analysis of SidD <i>in vitro</i> reaction. ....                                                                | 10 |
| Figure S7.  | High resolution MS/MS mass spectrum of tetra- <i>cis</i> -AMHO (4) from LC-MS analysis of SidD <i>in vitro</i> reaction. ....                                          | 11 |
| Figure S8.  | Mass spectrum of Fe-tetra- <i>cis</i> -AMHO Fe-(4) from LC-MS analysis of SidD <i>in vitro</i> reaction. ....                                                          | 12 |
| Figure S9.  | High resolution MS/MS mass spectrum of Fe-tetra- <i>cis</i> -AMHO (4) from LC-MS analysis of SidD <i>in vitro</i> reaction. ....                                       | 13 |
| Figure S10. | HPLC traces showing degradation of AMHO (1) to <i>N</i> <sup>5</sup> -hydroxy-L-ornithine and $\Delta^2$ -anhydro-mevalonate lactone (2) under acidic conditions. .... | 14 |
| Figure S11. | Possible mechanisms for spontaneous intermediate offloading to give 3. ....                                                                                            | 15 |
| Figure S12. | Plausible mechanisms for intermodular T domain loading.....                                                                                                            | 16 |
| Figure S13. | Biosynthetic assembly of <i>cis</i> -AMHO units by SidD( $\Delta C_7$ ). ....                                                                                          | 17 |
| Figure S14. | Proposed biosynthetic route to FSC (1) using the ‘back transfer’ approach. ....                                                                                        | 18 |
| Figure S15. | Proposed biosynthetic pathway for coprogen. ....                                                                                                                       | 19 |
| Figure S16. | <sup>1</sup> H-NMR spectrum of AMHO in CD <sub>3</sub> OD.....                                                                                                         | 20 |
| Figure S17. | <sup>13</sup> C-NMR spectrum of AMHO in CD <sub>3</sub> OD.....                                                                                                        | 21 |
| Figure S18. | <sup>1</sup> H- <sup>1</sup> H COSY-NMR spectrum of AMHO in CD <sub>3</sub> OD. ....                                                                                   | 22 |
| Figure S19. | HSQC-NMR spectrum of AMHO in CD <sub>3</sub> OD. ....                                                                                                                  | 23 |
| Figure S20. | HMBC-NMR spectrum of AMHO in CD <sub>3</sub> OD.....                                                                                                                   | 24 |
| Figure S21. | Gene-knockout of <i>sidG</i> in <i>A. nidulans</i> . ....                                                                                                              | 25 |
| 3.          | Tables.....                                                                                                                                                            | 26 |
| Table S1.   | Plasmid maps of wild-type constructs used in this study.....                                                                                                           | 26 |
| Table S2.   | Oligonucleotides used for cloning and mutagenesis in this study.....                                                                                                   | 27 |

|                                                                                                                                                                         |    |
|-------------------------------------------------------------------------------------------------------------------------------------------------------------------------|----|
| Table S3. $^1\text{H}$ and $^{13}\text{C}$ NMR chemical shifts of AMHO measured in $\text{CD}_3\text{OD}$ . The numbered structure of AMHO is shown for reference. .... | 28 |
| Table S4. Amino acid sequences of wild-type SidD protein and other SidD constructs used in this study. ....                                                             | 29 |
| Table S5. Calculated and measured mass values for species detected using intact protein mass spectrometry..                                                             | 32 |

## 1. Materials and Methods

### 1.1. Chemicals and general methods

Triacetylfusarinine C (TAFC), desferri-triacetylfusarinine C, fusarinine C (FSC), and desferri-fusarinine C were purchased from EMC microcollections, Germany. Isopropyl  $\beta$ -D-1-thiogalacopyranoside (IPTG) was purchased from Gold Biotechnology. All other chemicals were purchased from Fisher. PCR reactions were performed using the Phusion® high-fidelity DNA polymerase (New England Biolabs) according to the manufacturer's instructions. cDNA was synthesized by using the SuperScript® II Reverse Transcriptase Kit (Life Technologies). Custom oligonucleotides were synthesized by Integrated DNA Technologies. *Escherichia coli* strain DH10B strain was used for cloning procedures. NMR spectra were recorded on a Bruker AV500 spectrometer equipped with a cryo-probe. The HR-MS data were recorded on an Agilent 6545 Q-TOF LC-MS.

### 1.2. Protein heterologous expression and purification

The SidD (AFUA\_3G03420) gene exon fragments were cloned from the genomic DNA extract of *A. fumigatus ku80* strain.<sup>1</sup> The corresponding yeast expression plasmids were assembled through yeast homologous recombination using a Frozen-EZ Yeast Transformation II Kit (Zymo research). Gene fragments were integrated into a 2 $\mu$ -based yeast expression vector with auxotrophic markers and ADH2 promoter and terminator (plasmid maps see Table S1). To facilitate purification, SidD was fused with an *N*-terminal octahistidine tag. The full-length proteins were expressed in *S. cerevisiae* JHY686 strain cultured in YPD medium. Briefly, single colonies of yeast cells harboring expressing plasmids was inoculated into SDCt uracil drop-out culture and left grown at 28 °C for 2 days. The seed culture was then inoculated into YPD culture (1 ml to 50 mL) and left grown at 28 °C for another 2 days. Cells were harvested by centrifugation and washed once with cell lysis buffer (50 mM K<sub>2</sub>HPO<sub>4</sub> (pH 7.5), 10 mM imidazole, 300 mM NaCl, 5% glycerol). Cells were flash frozen in liquid nitrogen and lysed by using a stainless-steel Waring blender. The cell lysate was cleared by centrifugation at 26,000 g for 60 min at 4 °C and the supernatant was filtered through a 0.22  $\mu$ m filter (Millipore). The filtrate was incubated with Ni<sup>2+</sup>-NTA resin for 30 min at 4 °C and then the slurry was loaded onto a gravity column. The resin was washed and eluted with increasing concentrations of imidazole in cell lysis buffer. The fractions were examined by SDS-PAGE gels (Figure S1). Pure fractions were concentrated to 20 mg/mL by Amicon concentrators (Millipore), supplemented with 10% glycerol and stored at -80 °C. Protein concentrations were determined by Bradford assay. Typically, 2 L cell culture could yield 1-10 mg proteins depending on the nature of the protein construct.

For bacterial expression, the target regions were subcloned into a modified pET28a (+) vector (Addgene plasmid #29656). The resulting *N*-terminal TEV protease cleavable hexahistidine tagged individual domains were overexpressed in *E. coli* BL21(DE3) cells in LB medium in the presence of 50 mg/L kanamycin. Expression was induced by 100  $\mu$ M IPTG when OD<sub>600</sub> reached 0.8 and the cell cultures were left grown at 16 °C overnight. Cells

were harvested by centrifugation and lysed by sonication. Purification was performed similarly to the full-length protein.

### 1.3. Genetic manipulation

The *A. nidulans*  $\Delta$ SidG strain derived from the parent *A. nidulans*  $\Delta$ EM strain<sup>2</sup> was constructed by integration of a *pyroA* marker to the *SidG* loci (AN8539) through homologous recombination. The integration of marker was selected by dropping out pyridoxin from the growth medium and verified by colony-PCR (**Figure S11**). The resulting strain was fermented to obtain fusigen and desferrifusigen.

### 1.4. Siderophore isolation and amino acid substrate preparation

The amino acid substrate *N*<sup>5</sup>-*cis*-anhydromevalonyl-*N*<sup>5</sup>-hydroxy-L-ornithine (AMHO) was prepared via ester base hydrolysis of fusarinine C. To prepare Fe-AMHO substrate, 1 mg of commercially available FSC-Fe complex was dissolved in water and the pH was adjusted to 12 with 1 M NaOH. The solution was stirred at room temperature for 15 min and then neutralized with 1 M HCl. The resulting solution was lyophilized and the Fe-AMHO substrate was used without further purification. To prepare Fe-free AMHO, FSC was isolated from the *A. nidulans*  $\Delta$ SidG strain (see **Section 1.3**) when cultured under the iron-limiting condition (minimal medium containing 1% glucose as the carbon source, 20 mM glutamine as the nitrogen source and 20  $\mu$ g/L biotin)<sup>3</sup> at 37 °C. The culture filtrate was fractionated with Amberlite XAD-16 (Sigma-Aldrich) resin using a gradient of H<sub>2</sub>O/MeOH. Fractions containing FSC were combined and the organic solvent was removed by rotary evaporation. The pH of the aqueous solution was brought up to 12 by addition of 1M NaOH. The solution was stirred at room temperature for 1 hr and then neutralized with 1M HCl. The resulting L-AHMO was further purified by semipreparative HPLC using a reverse-phase column (Phenomenex Kinetics, C18, 5  $\mu$ m, 100 Å, 250 x 4.6 mm). Ammonium formate 0.1% (w/v) was added to the mobile phase (H<sub>2</sub>O/MeCN) as the ion-pairing agent. The identity of AMHO was verified by NMR and HRMS analysis. The NMR spectra data are consistent with the literature data and are summarized in **Table S3**.<sup>4</sup>HRMS: calc. for [M+H]<sup>+</sup> C<sub>11</sub>H<sub>21</sub>N<sub>2</sub>O<sub>5</sub><sup>+</sup>, 261.1445; found 261.1447.

### 1.5 Biochemical characterization of SidD *in vitro*.

Purified SidD and associated variants/mutants were converted to their *holo*- form by incubation in 20 mM Tris HCl, 100 mM NaCl, 2  $\mu$ M of NpgA, 0.1 mM CoA and 10 mM MgCl<sub>2</sub> in a total volume of 50  $\mu$ L for 1 hrs at 25 °C. Reaction was initiated by addition of ATP (5 mM) and AMHO (1 mM) in a final volume of 50  $\mu$ L, and the reaction was allowed to proceed at 25 °C. At different time points, the reaction was quenched by mixing with equal volume of methanol. The reaction products were analyzed on an UHPLC-MS on a Shimadzu 2020 EVLC-MS (Phenomenex kinetex, 1.7  $\mu$ m, 2.0 x 100 mm, C18 column) using positive and negative mode electrospray

ionization with a linear gradient of 5–95% MeCN–H<sub>2</sub>O supplemented with 0.1% (v/v) formic acid in 15 min followed by 95% MeCN for 5 min with a flow rate of 0.3 mL/min.

For steady-state kinetics, 1  $\mu$ M of *holo*-SidD was used in the assay and the reaction was quenched after 5 min by mixing with equal volume of methanol. To convert desferri-FSC into ferri-FSC, 1 mM FeCl<sub>3</sub> was added to the reaction mixture and the product was quantified by HPLC. An external standard curve was made by using commercially available ferri-FSC standard.

## 1.6 UHPLC-ESI-Q-TOF-MS analysis of intact proteins

Purified SidD and associated mutants were converted to their *holo*- form as described above, except that Sfp enzyme was used and the incubation time was 3 hrs. Loading of AMHO was initiated by addition of ATP (5 mM) and AMHO (1 mM) in a final volume of 50  $\mu$ L, and the loading reaction was allowed to proceed for 15 min or 1 hr at 25 °C before intact protein analysis by UHPLC-ESI-Q-TOF-MS.

Enzymatic assays were analyzed on a Bruker MaXis II ESI-Q-TOF-MS connected to a Dionex 3000 RS UHPLC fitted with an ACE C4-300 RP column (100 x 2.1 mm, 5  $\mu$ m, 30 °C). The column was eluted with a linear gradient of 5–100% MeCN containing 0.1% formic acid over 30 min. The mass spectrometer was operated in positive ion mode with a scan range of 200–3000 m/z. Source conditions were: end plate offset at –500 V; capillary at –4500 V; nebulizer gas (N<sub>2</sub>) at 1.8 bar; dry gas (N<sub>2</sub>) at 9.0 L min<sup>-1</sup>; dry temperature at 200 °C. Ion transfer conditions were: ion funnel RF at 400 Vpp; multiple RF at 200 Vpp; quadrupole low mass at 200 m/z; collision energy at 8.0 eV; collision RF at 2000 Vpp; transfer time at 110.0  $\mu$ s; pre-pulse storage time at 10.0  $\mu$ s.

## 2. Figures.

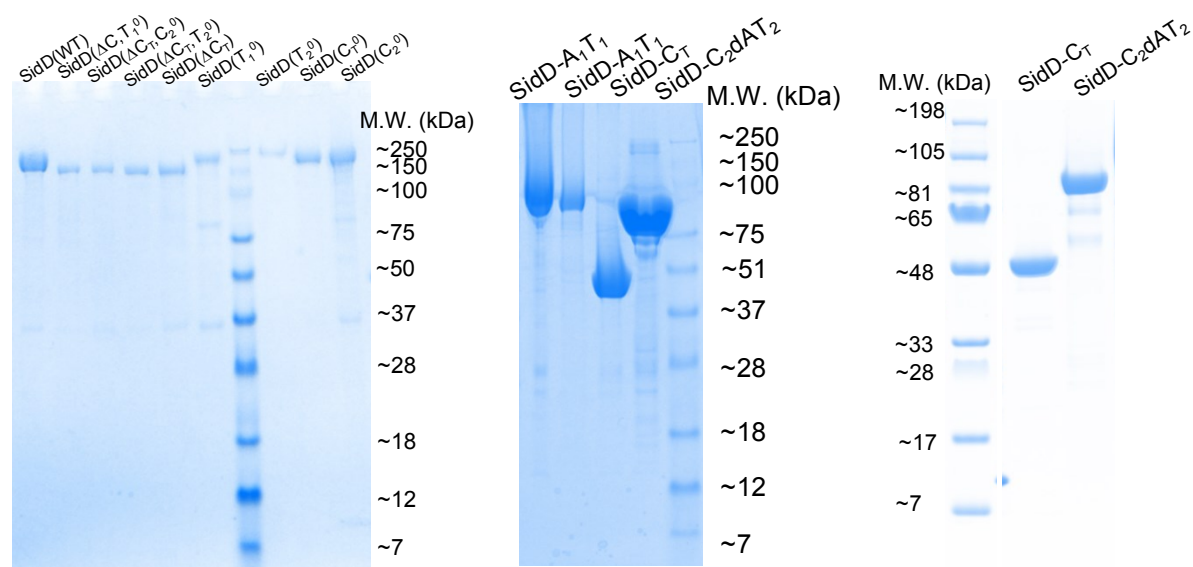

**Figure S1.** SDS-PAGE analysis of purified SidD and related variants used in this study.

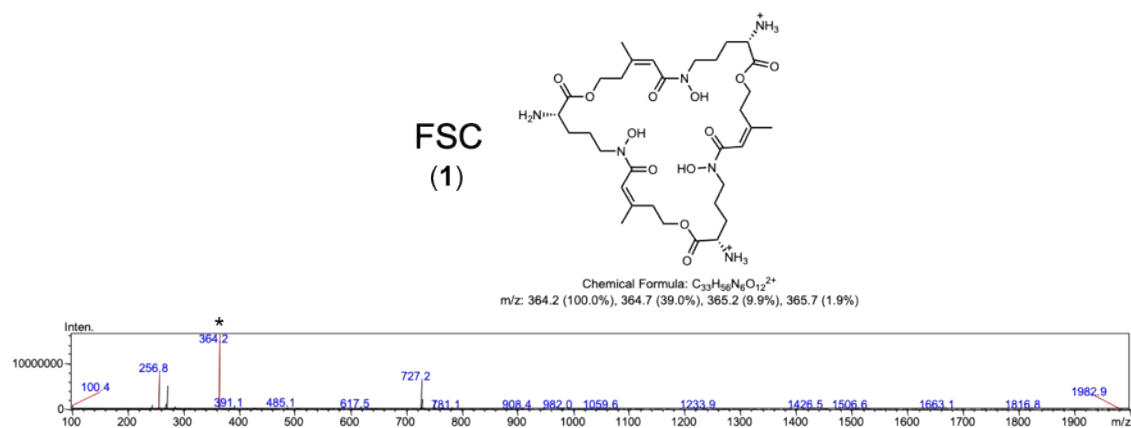

**Figure S2.** Mass spectrum of FSC (1) from LC-MS analysis of SidD in vitro reaction. The  $[M+H]^+$  species is highlighted with an asterisk (\*) above the peak.

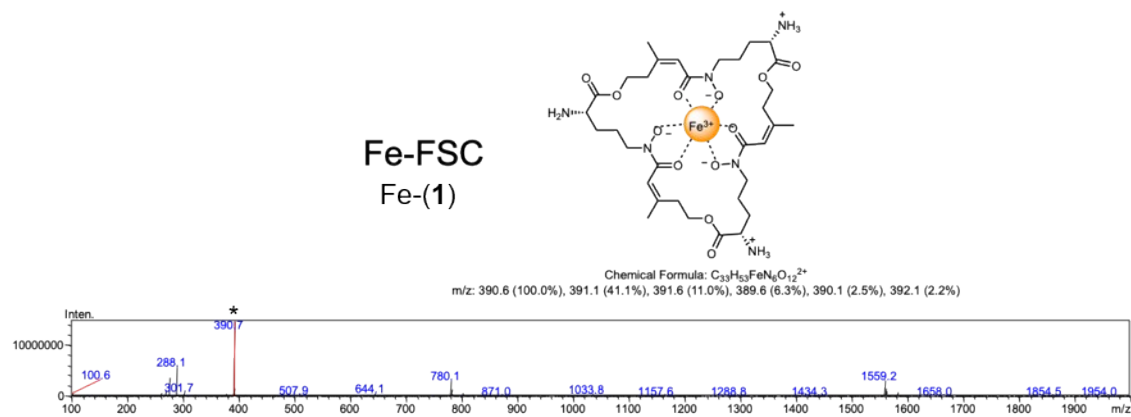

**Figure S3.** Mass spectrum of Fe-FSC Fe-(1) from LC-MS analysis of SidD in vitro reaction. The  $[M+H]^+$  species is highlighted with an asterisk (\*) above the peak.



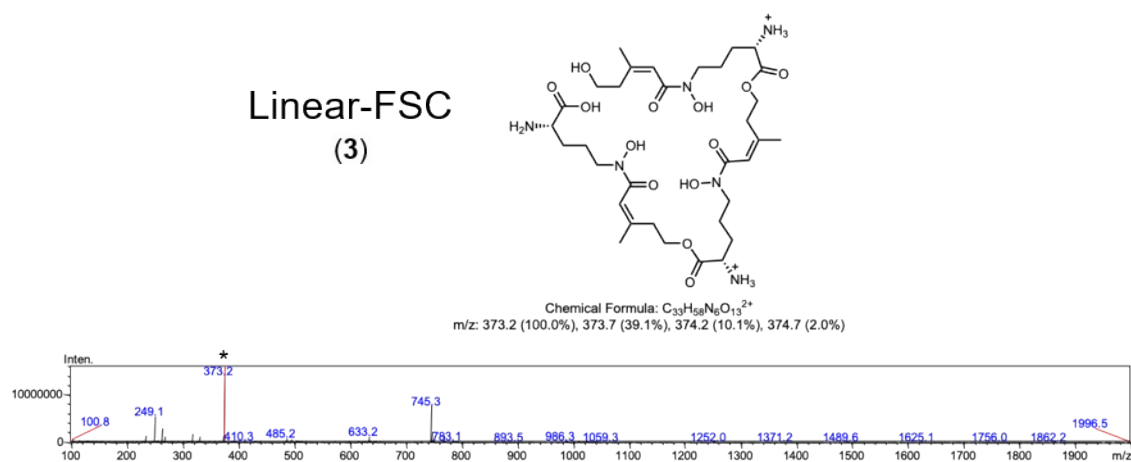

**Figure S4.** Mass spectrum of Linear-FSC (3) from LC-MS analysis of SidD *in vitro* reaction. The  $[M+H]^+$  species is highlighted with an asterisk (\*) above the peak.

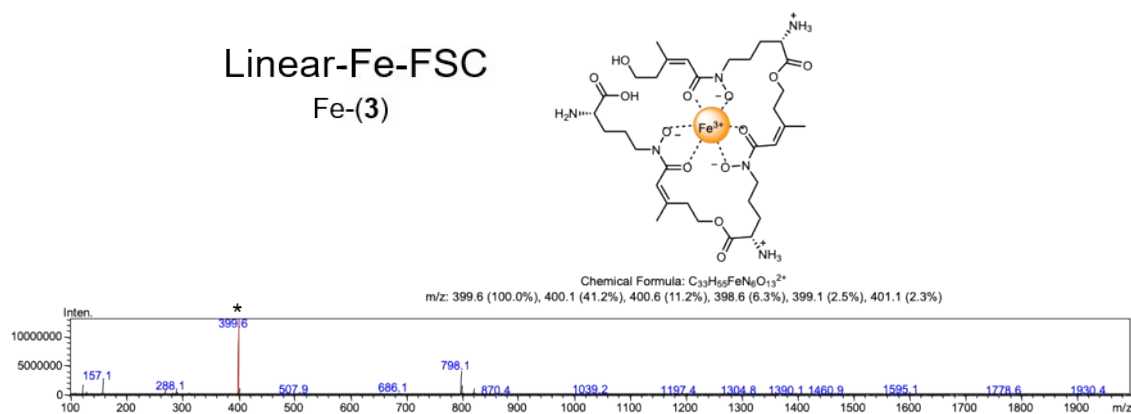

**Figure S5.** Mass spectrum of Linear-Fe-FSC Fe-(3) from LC-MS analysis of SidD *in vitro* reaction. The  $[M+H]^+$  species is highlighted with an asterisk (\*) above the peak.

Tetra-*cis*-AMHO  
(4)

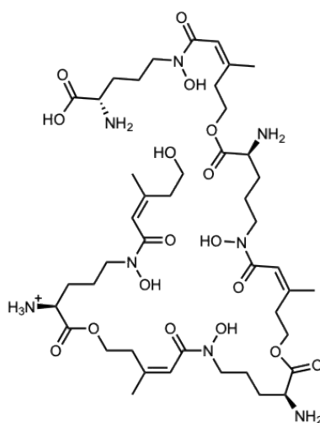

Chemical Formula: C<sub>44</sub>H<sub>75</sub>N<sub>8</sub>O<sub>17</sub><sup>+</sup>

m/z: 987.5245 (100.0%), 988.5279 (47.6%), 989.5312 (11.1%), 989.5288 (3.5%), 988.5216 (3.0%), 990.5346 (1.7%), 990.5321 (1.7%), 989.5249 (1.4%)

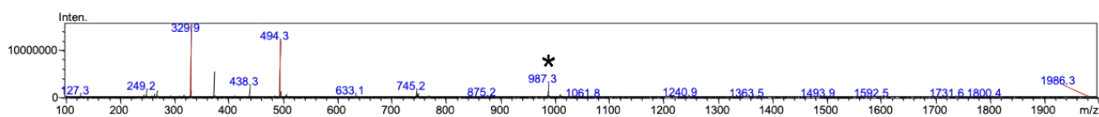

**Figure S6.** Mass spectrum of tetra-*cis*-AMHO (4) from LC-MS analysis of SidD *in vitro* reaction. The [M+H]<sup>+</sup> species is highlighted with an asterisk (\*) above the peak.

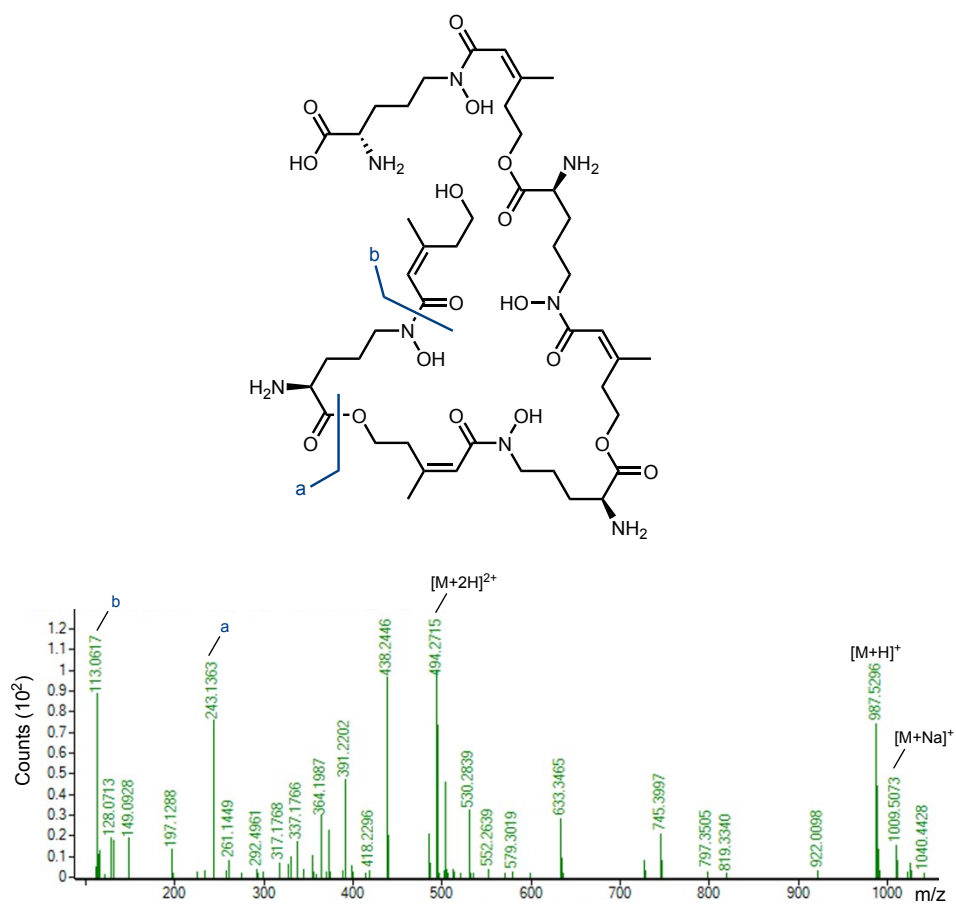

**Figure S7.** High resolution MS/MS mass spectrum of tetra-*cis*-AMHO (4) from LC-MS analysis of SidD *in vitro* reaction.

The [M+H]<sup>+</sup>, [M+Na]<sup>+</sup> and [M+2H]<sup>2+</sup> species are annotated in addition to fragmentations highlighted on both the structure and spectrum.

Fe-Tetra-*cis*-AMHO  
Fe-(4)

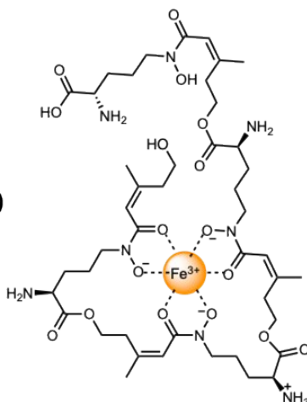

Chemical Formula:  $C_{44}H_{72}FeN_8O_{17}^+$   
 m/z: 1040.4360 (100.0%), 1041.4393 (47.6%), 1042.4427 (11.1%), 1038.4407 (6.4%), 1042.4402 (3.5%), 1039.4440 (3.0%), 1041.4330 (3.0%), 1041.4364 (2.3%), 1043.4460 (1.7%), 1043.4436 (1.7%), 1042.4364 (1.4%), 1042.4398 (1.1%)

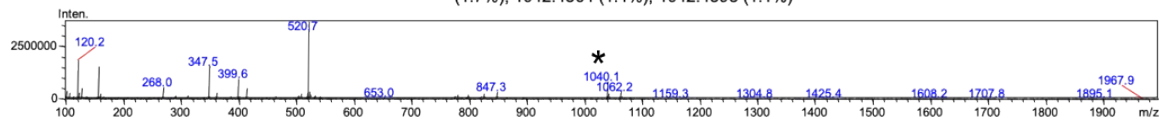

**Figure S8.** Mass spectrum of Fe-tetra-*cis*-AMHO Fe-(4) from LC-MS analysis of SidD *in vitro* reaction.

The  $[M+H]^+$  species is highlighted with an asterisk (\*) above the peak.

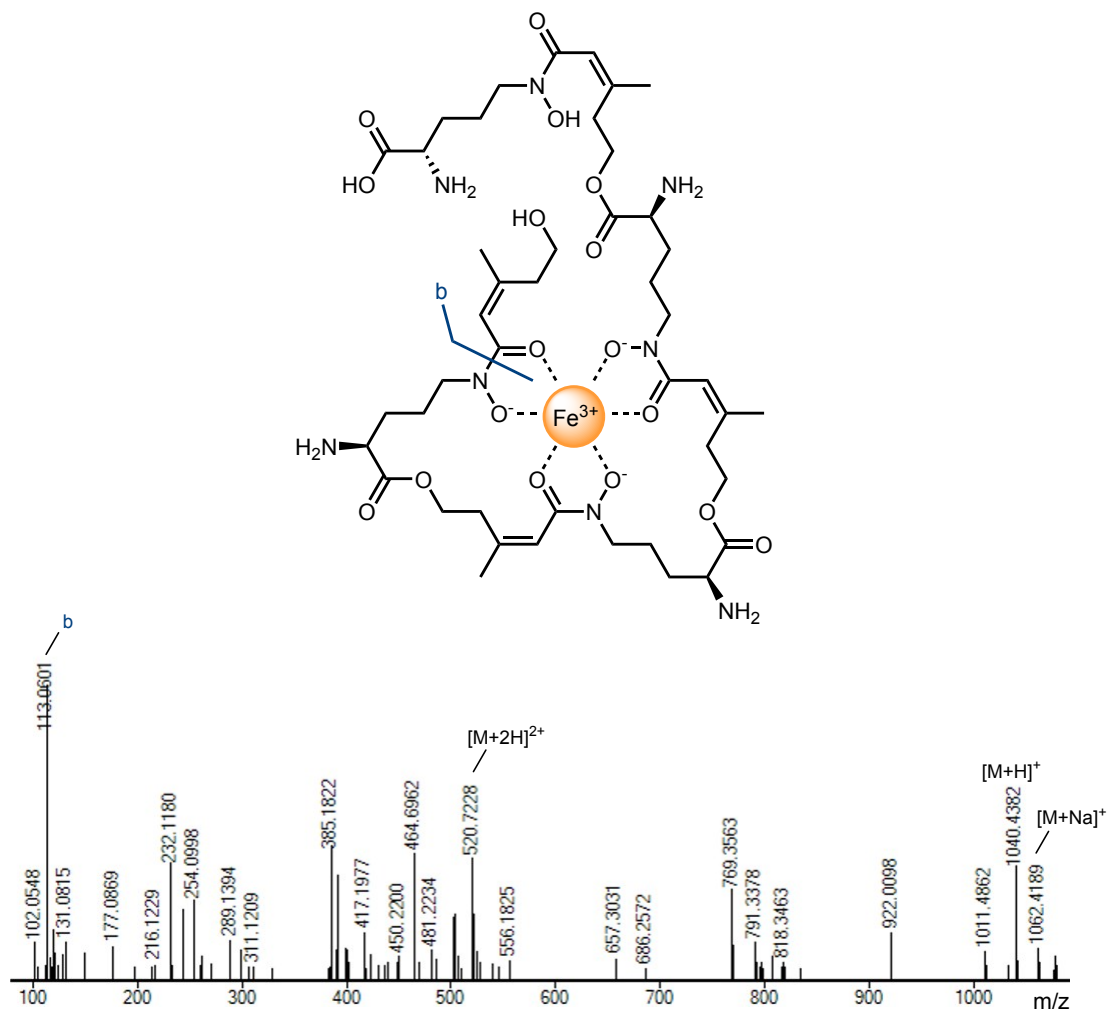

**Figure S9.** High resolution MS/MS mass spectrum of Fe-tetra-*cis*-AMHO (**4**) from LC-MS analysis of SidD *in vitro* reaction.

The  $[M+H]^+$ ,  $[M+Na]^+$  and  $[M+2H]^{2+}$  species are annotated in addition to fragmentations highlighted on both the structure and spectrum.

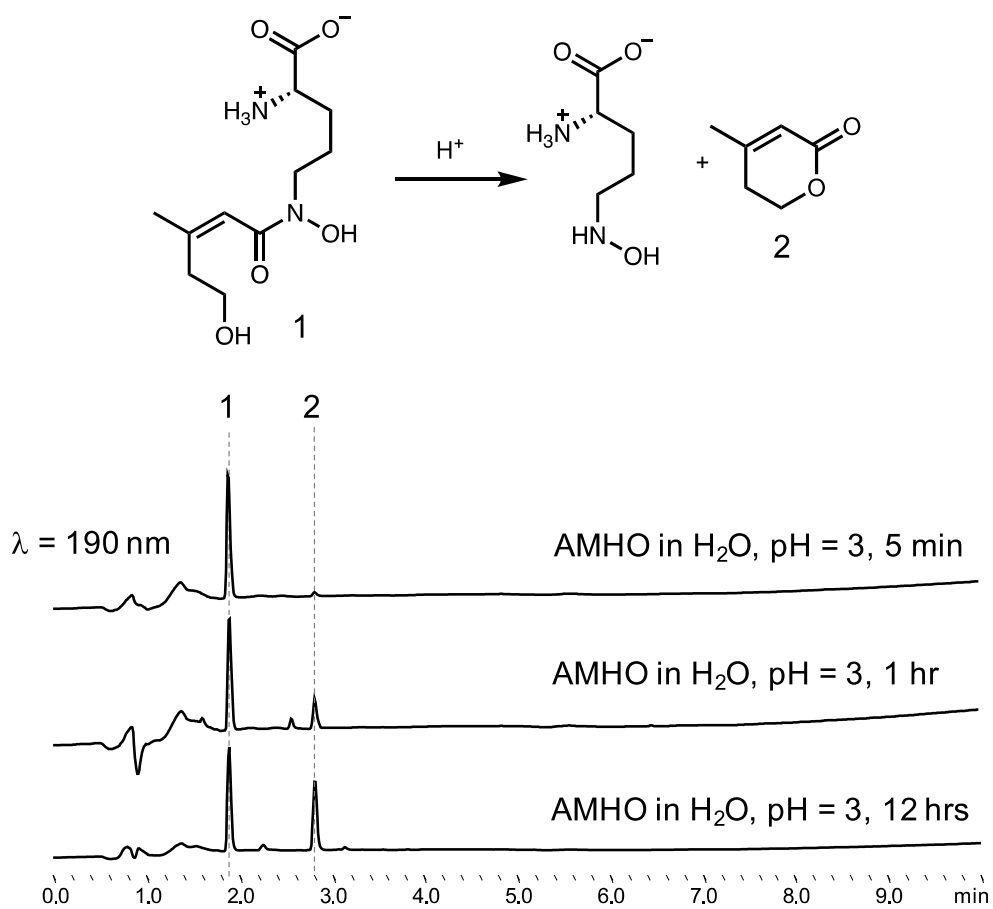

**Figure S10.** HPLC traces showing degradation of AMHO (1) to  $N^5$ -hydroxy-L-ornithine and  $\Delta^2$ -anhydro-mevalonate lactone (2) under acidic conditions.

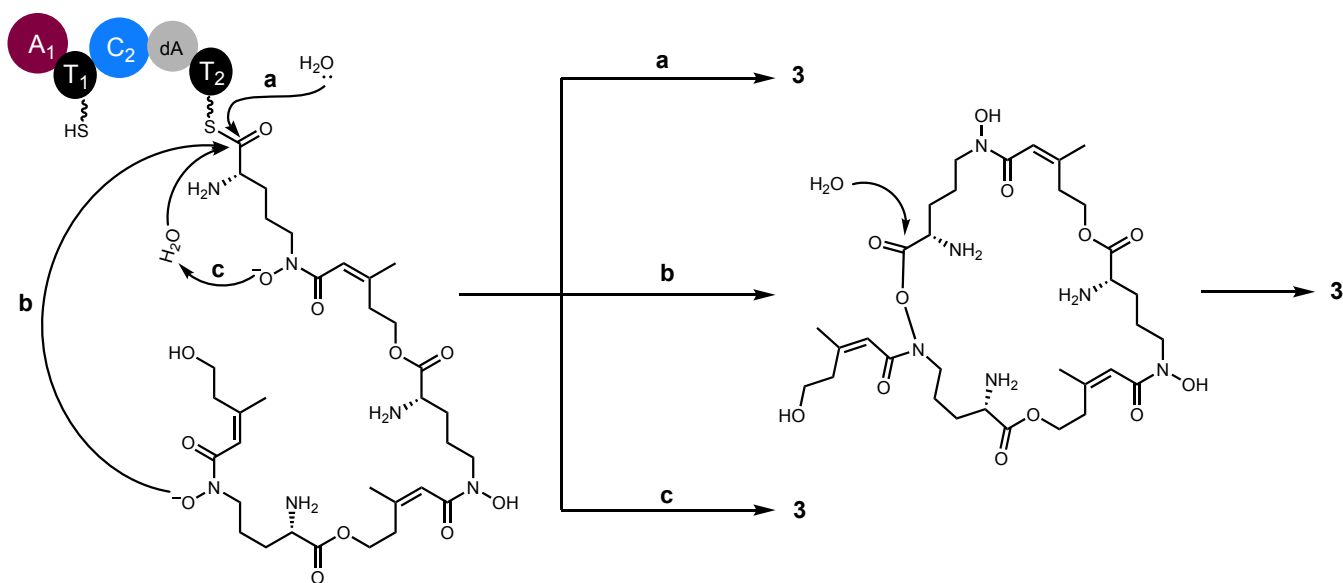

**Figure S11.** Possible mechanisms for spontaneous intermediate offloading to give **3**.

The observation that, in the presence of  $\text{Fe}^{3+}$ , hydrolyzed intermediate **3** is not detected suggests direct hydrolysis by water (route a) is slow while a free-hydroxamate group could promote cleavage of thioester either through a non-enzymatic intramolecular nucleophilic attack on the carbonyl of the thioester (route b), or act as a general base (route c). The shunt product **4** could be generated in a similar way.

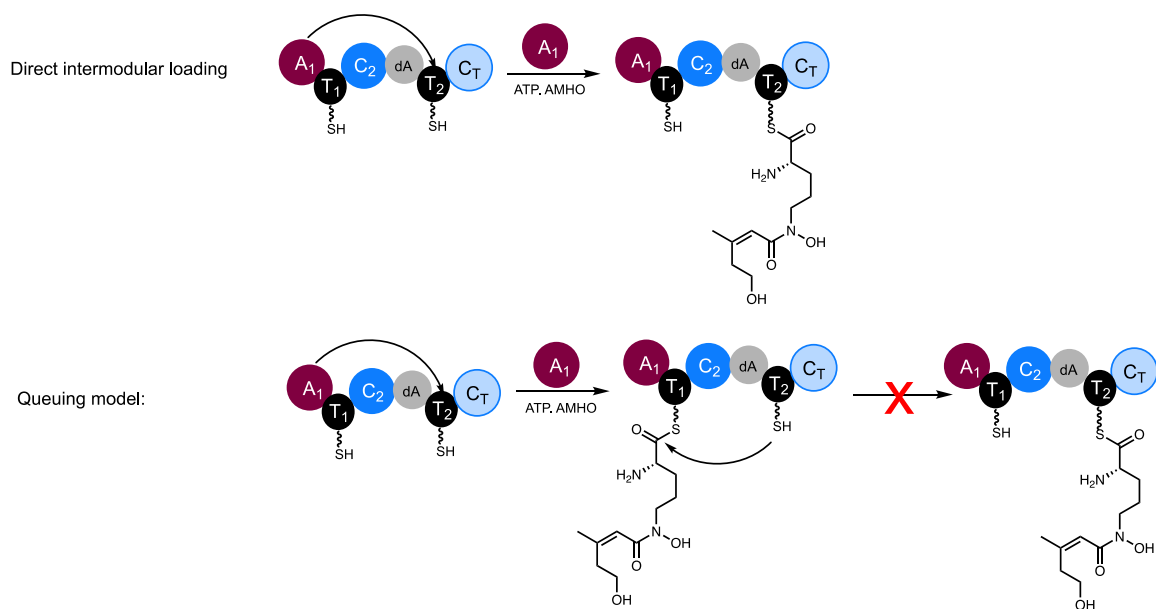

**Figure S12.** Plausible mechanisms for intermodular T domain loading. As discussed in the main text, a queuing model is disproved since loading of  $T_2$  is  $T_1$ -independent.



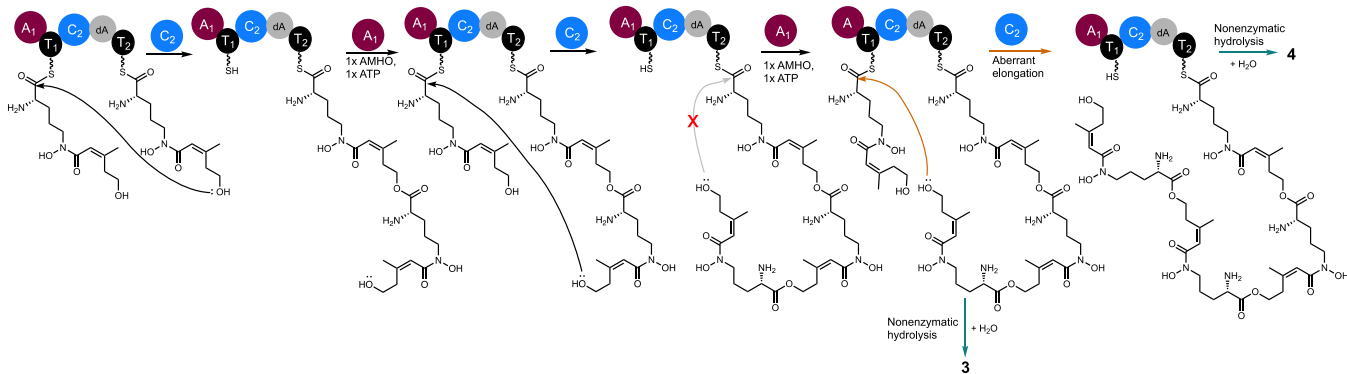

**Figure S13.** Biosynthetic assembly of *cis*-AMHO units by SidD( $\Delta C_7$ ).

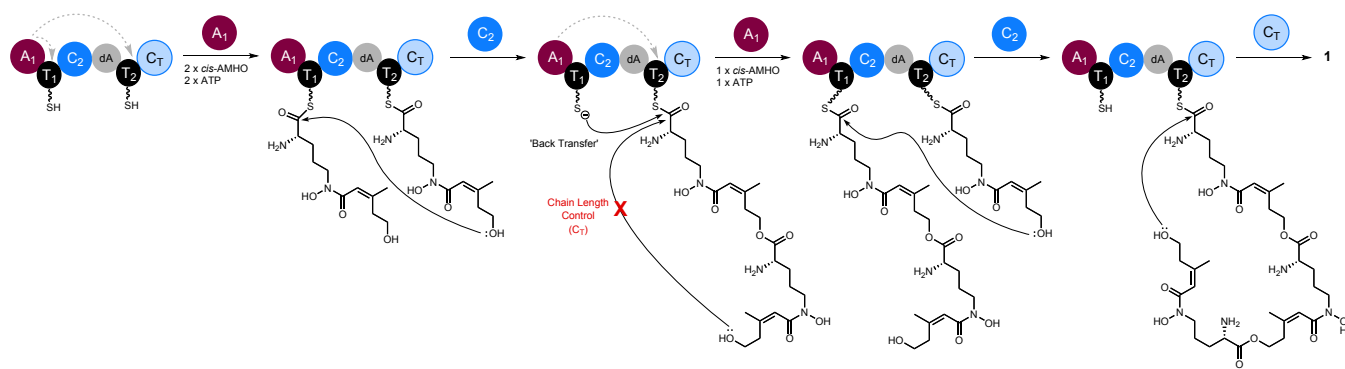

**Figure S14.** Proposed biosynthetic route to FSC (1) using the 'back transfer' approach.

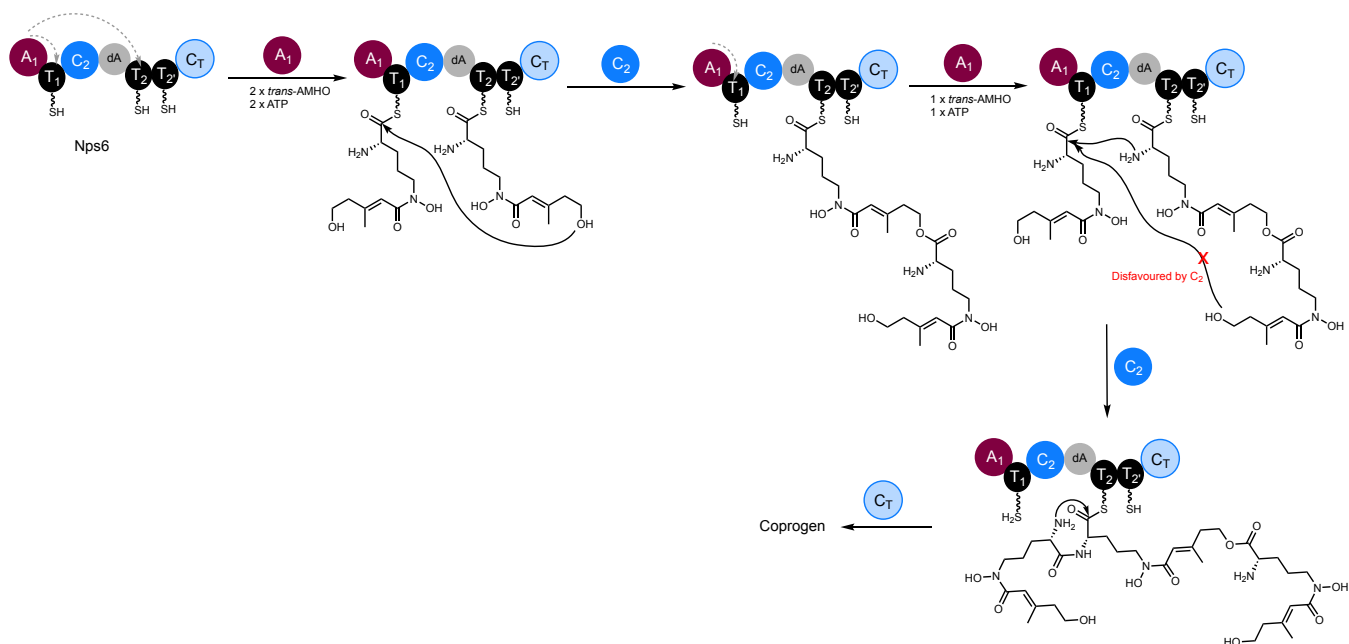

**Figure S15.** Proposed biosynthetic pathway for coprogen.

For clarity, the intermediates on T<sub>2</sub>' are not shown. T<sub>2</sub>' is proposed to work in parallel to T<sub>2</sub> to increase the overall flux of the assembly line.

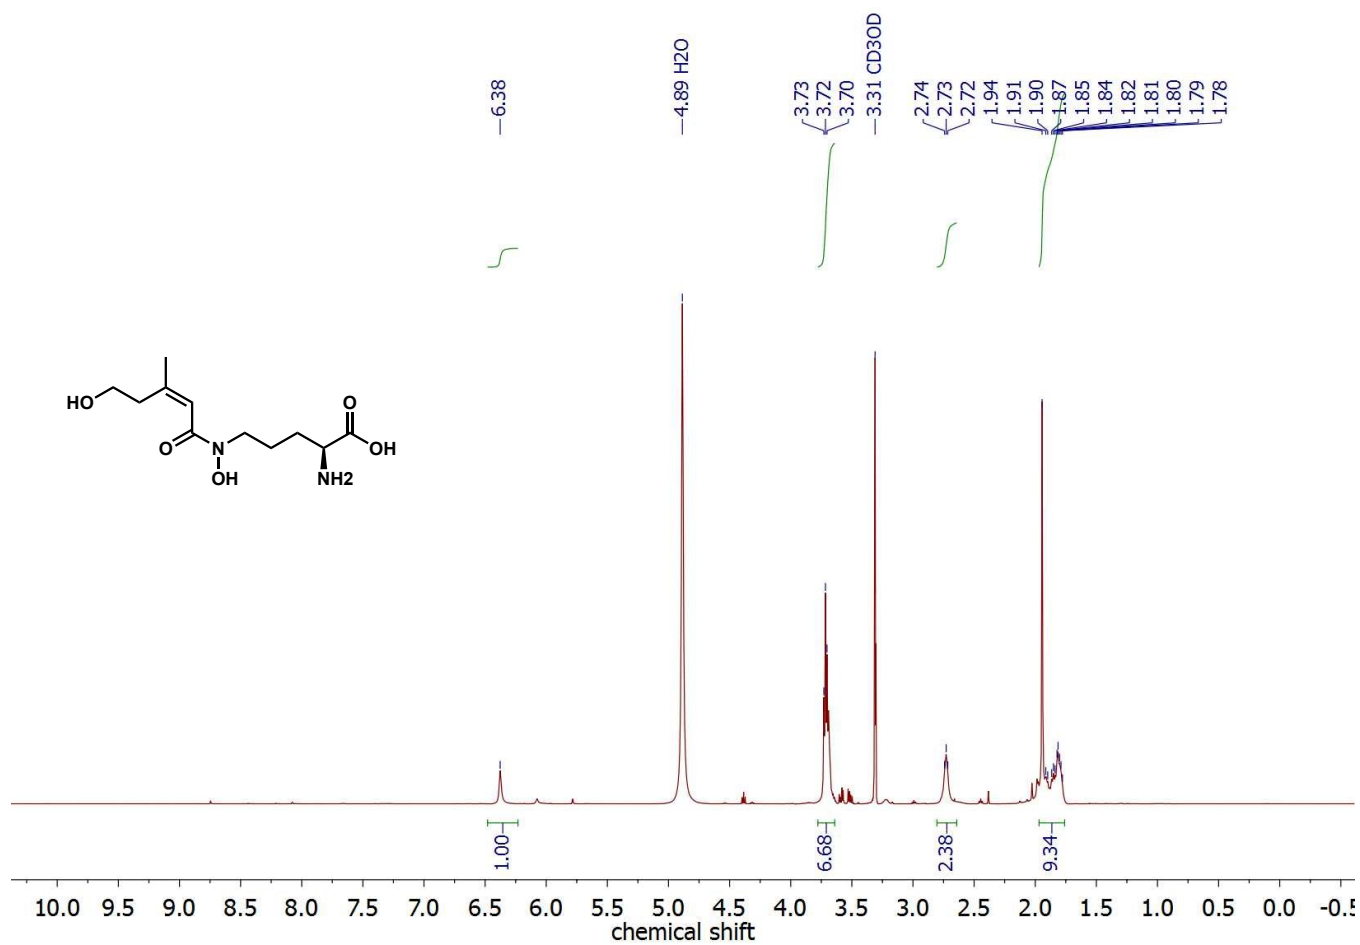

**Figure S16.** <sup>1</sup>H-NMR spectrum of AMHO in CD<sub>3</sub>OD.

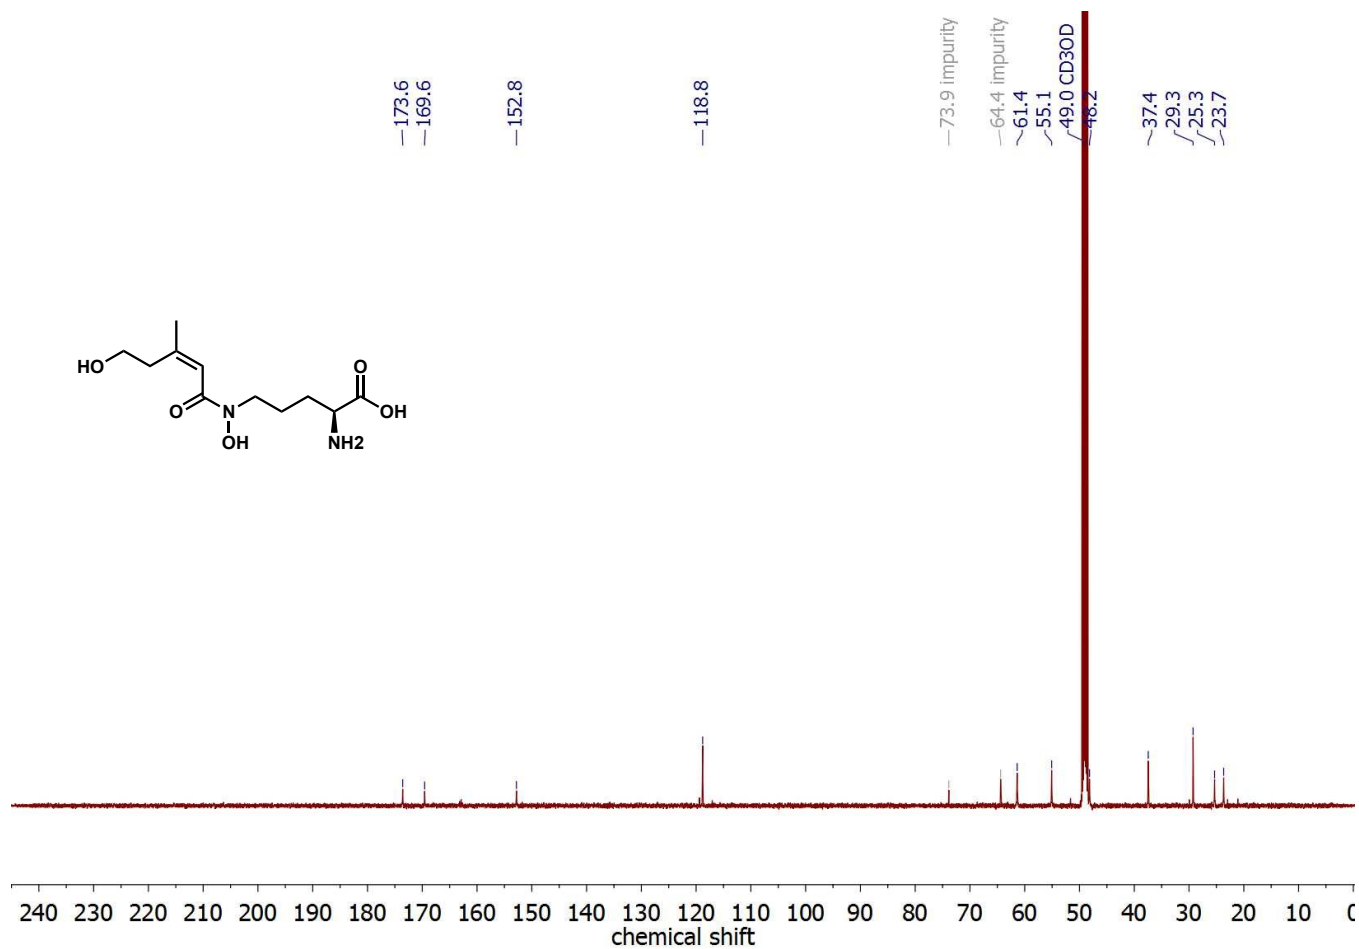

**Figure S17.**  $^{13}\text{C}$ -NMR spectrum of AMHO in  $\text{CD}_3\text{OD}$ .

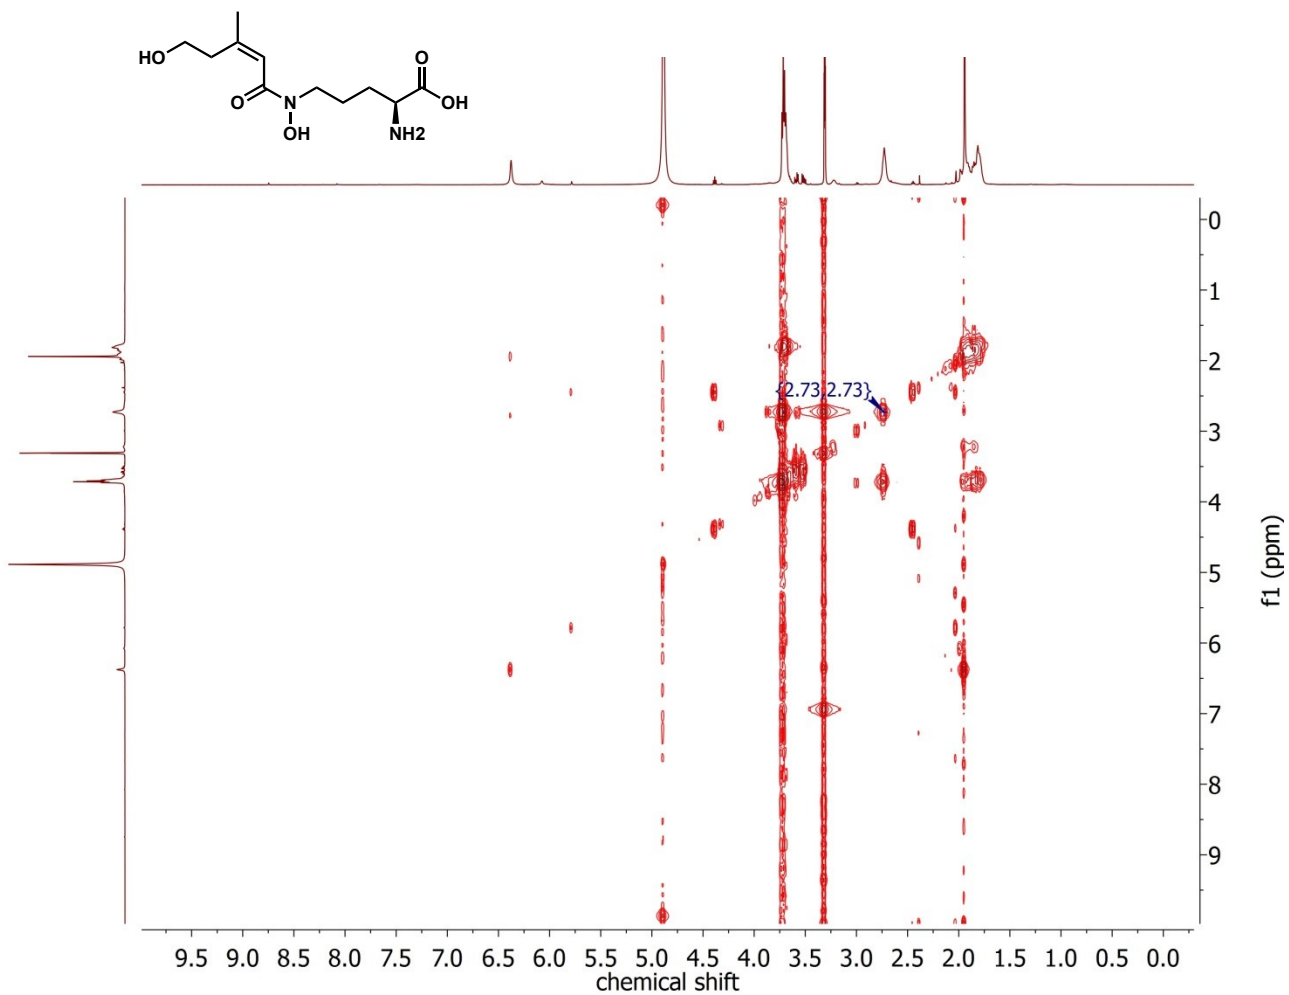

**Figure S18.**  $^1\text{H}$ - $^1\text{H}$  COSY-NMR spectrum of AMHO in  $\text{CD}_3\text{OD}$ .

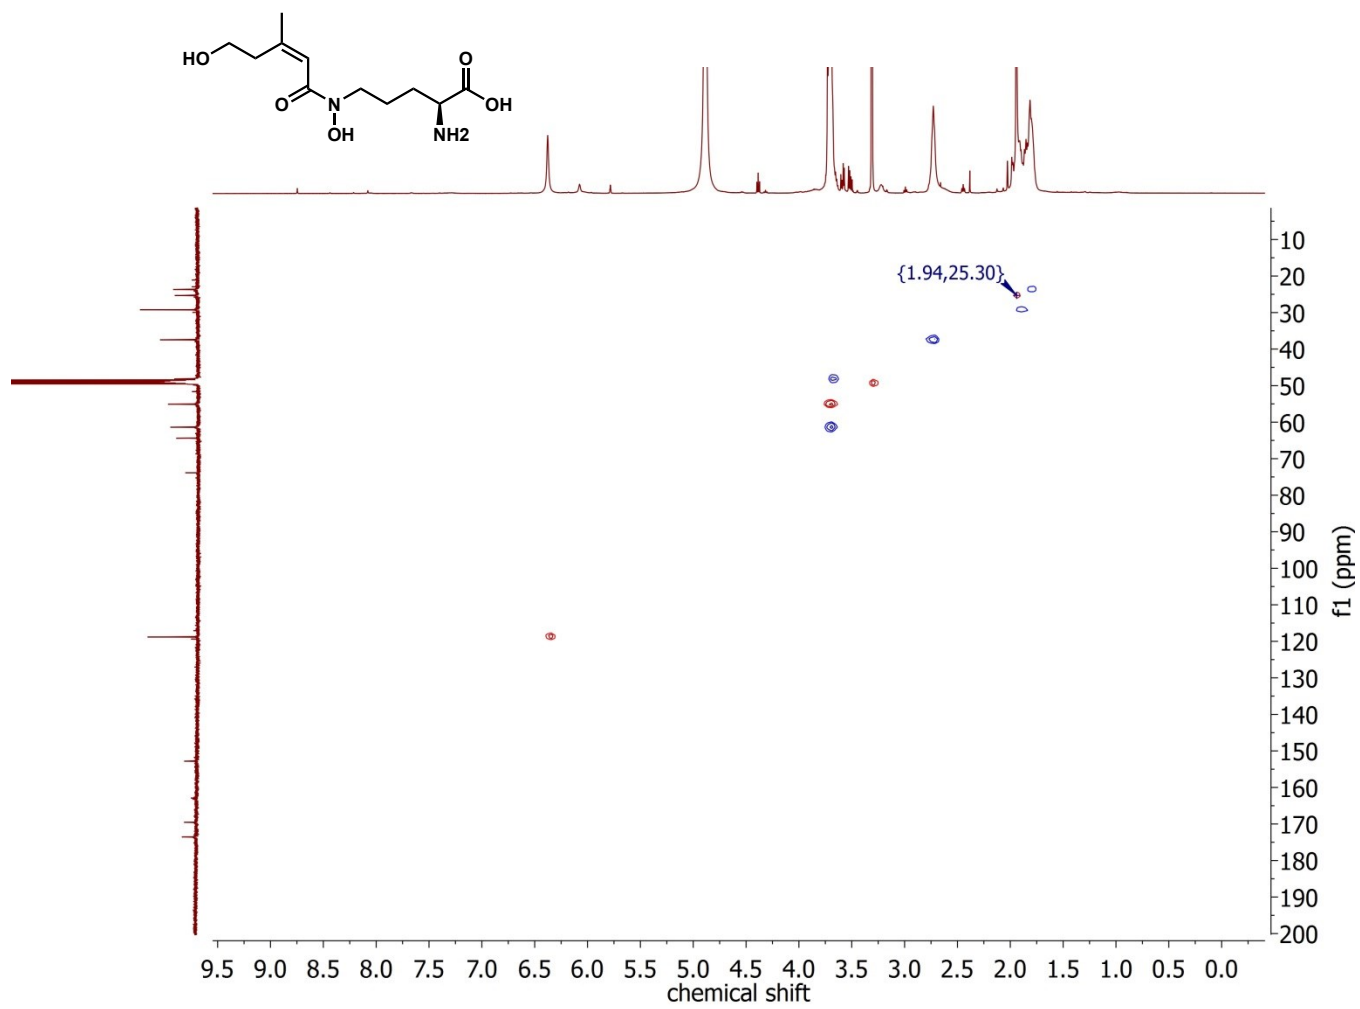

**Figure S19.** HSQC-NMR spectrum of AMHO in CD<sub>3</sub>OD.

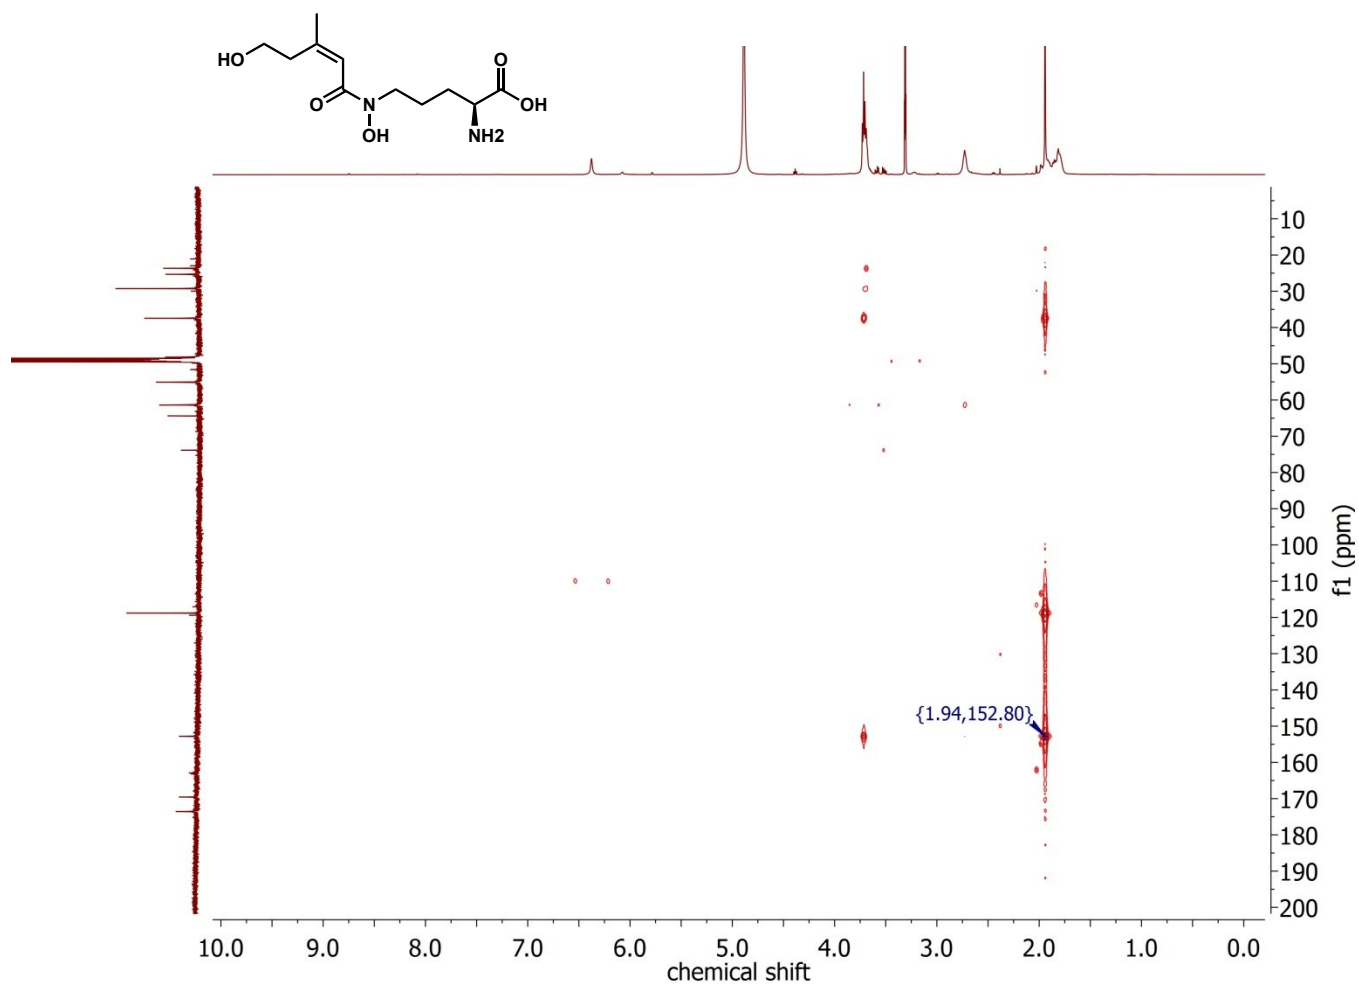

**Figure S20.** HMBC-NMR spectrum of AMHO in CD<sub>3</sub>OD.



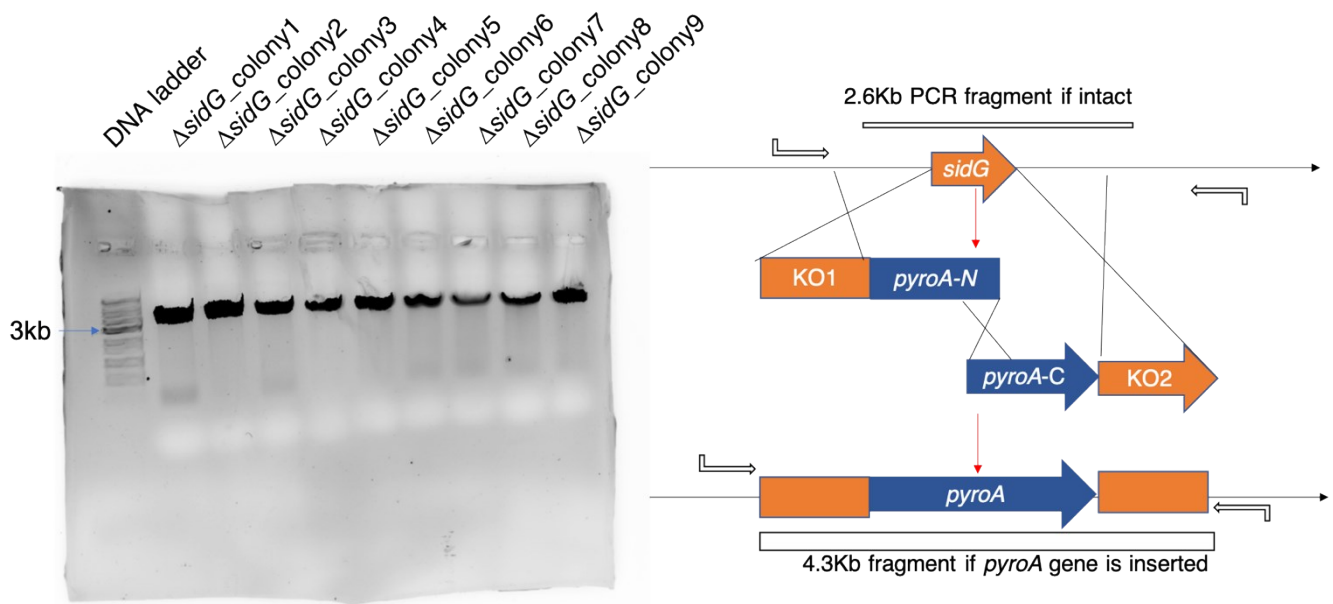

**Figure S21.** Gene-knockout of *sidG* in *A. nidulans*. Replacement of *sidG* gene by *pyroA* marker. Successful gene replacement will cause size change of PCR fragments from 2.6 kb to 4.3 kb.

### 3. Tables

**Table S1.** Plasmid maps of wild-type constructs used in this study.

| Name                                       | Plasmid map |
|--------------------------------------------|-------------|
| xw55-SidD                                  |             |
| pET28-SidD-A <sub>1</sub> T <sub>1</sub>   |             |
| pET28-SidD-C <sub>2</sub> dAT <sub>2</sub> |             |
| pET28-SidD-C <sub>T</sub>                  |             |

**Table S2.** Oligonucleotides used for cloning and mutagenesis in this study.

| Name                                          | Sequence (5'-3')                                              |
|-----------------------------------------------|---------------------------------------------------------------|
| SidD-xw55-F1                                  | ATGGCTAGCCATCACCATCACCATCACCATCACA CTGGTTCAATACAGCAAGATGAC    |
| SidD-xw55-R1                                  | GATTTCTAGGTGAAGTAACCCTTCATCTTTTGCTTCGCTG                      |
| SidD-xw55-F2                                  | CAGACGAAGCAAAAGATGAAGGGT TACTTCACCTAGAAATC                    |
| SidD-xw55-R2                                  | AAATCGTGAAGGCATCGGTCCGCACAAATTTGTCATTTTCACTGTCCACTAAACA ACTTG |
| SidD-H1802A-xw55-F                            | CATCGGCTTATCCGCCGCCAATACGATGGCGTCTC                           |
| SidD-H1802A-xw55-R                            | CATCGTATTGGGCGGCGGATAAGCCGATGACGAGGCAG                        |
| SidD-ΔC <sub>T</sub> -xw55-R                  | GATAATGAAA ACTATAAAATCGTGAAGGCATTTCATGAGCGTTCATCCACCTTCATC    |
| SidD-A <sub>1</sub> T <sub>1</sub> -xw55-R    | GATAATGAAA ACTATAAAATCGTGAAGGCATTTCATGAGCGTTCATCCACCTTCATC    |
| SidD-ΔC <sub>T</sub> -xw55-F                  | GATAATGAAA ACTATAAAATCGTGAAGGCATTTCATGAGCGTTCATCCACCTTCATC    |
| SidD-S1594A-xw55-F                            | GCGGTGGTGATGCCG TACTTGCAATGAAG                                |
| SidD-S1594A-xw55-R                            | CAAGTACGGCATCACCACCGCGCCGGAAG                                 |
| SidD-H999A-xw55-F                             | GATACATGGTTTGGACTATTACGCTGTGTTGTACGATGGGTGGTCAG               |
| SidD-H999A-xw55-R                             | CTGACCACCCATCGTACAACACAGCGTGAATAGTCCAAACCATGTATC              |
| SidD-S801A-xw55-F                             | CTCTTGGTGGAGACGCCCTCACAGCCATGAAGCTG                           |
| SidD-S801A-xw55-R                             | CTTCATGGCTGTGAGGGCGTCTCCACCAAGAGCGAAG                         |
| SidD-C <sub>T</sub> -pET28-F                  | CACCATGAAAACCTGTACTTCCAATCCAATTCATATCAGCCGTTTTTCGATGCTCCGTC   |
| SidD-C <sub>T</sub> -pET28-R                  | GAATTCGGATCCGTTATCCACTTCCAATTCACTGTCCACTAAACA ACTTGCTATCCAGC  |
| SidD-A <sub>1</sub> T <sub>1</sub> -pET28-F   | CACCATGAAAACCTGTACTTCCAATCCAATGGTTCAATACAGCAAGATGACGTT CACAAT |
| SidD-A <sub>1</sub> T <sub>1</sub> -pET28-R   | TTCGGATCCGTTATCCACTTCCAATttaGTCGACGTCGAAATACGGACAACG          |
| SidD-T <sub>2</sub> -pET28-F                  | ACCTGTA CTTCCAATCCAATTCAGCTTCAGAAAAGCATTCTGCGGTC              |
| SidD-T <sub>2</sub> -pET28-R                  | GATCCGTTATCCACTTCCAATTCATGAGCGTTCATCCACCTTCATC                |
| SidD-C <sub>2</sub> dAT <sub>2</sub> -pET28-F | CACCATGAAAACCTGTACTTCCAATCCAATGACGTGCAAAGGACAGTCCCGGCATTCTCG  |
| SidD-C <sub>2</sub> dAT <sub>2</sub> -pET28-R | GATCCGTTATCCACTTCCAATTCATGAGCGTTCATCCACCTTCATC                |
| SidG-KOcassette1-F                            | CAATCAACTATCAACTATTA ACTATATCGTAATACGGGCTGCTGGCATGTAC         |
| SidG-KOcassette1-R                            | CTGACAGCGCCATAAGACAAGGTGAACTGGCGGTGGGGGTGGTAG                 |
| SidG-KOpyroA-F                                | CACCGCCAGTTCACCTTGCTTATGGCGCTGTCAGGGTGTGTATTCAAG              |
| SidG-KOpyroA-R                                | GTAGTTTTTTTGACCTTTATCCCCTGGTATCATGGTTGTTGGGTC                 |
| SidG-KOcassette2-F                            | CAACCATGATACCAGGGGATAAAGGTCAAAAAA ACTACTTTCATATAAAAAACATG     |
| SidG-KOcassette2-R                            | CATACTTGATAATGAAA ACTATAAAATCGTGAAGGCATCTATTCTCCTTCTCTGCATC   |
| SidG-KOsplit-pyroA-N-F                        | GGGCTGCTGGCATGCACCCTTG                                        |
| SidG-KOsplit-pyroA-N-R                        | CTGT CATGGCCAAAGCTCGTATCGG                                    |
| SidG-KOsplit-pyroA-C-F                        | GAACACTCCGTCGCAGCCAG                                          |
| SidG-KOsplit-pyroA-C-R                        | CTATTCTCCTTCTCTGCATCCGACCAAG                                  |

SidG-KOcheckF

GCCTGTGTATCGATACTAGCGCACG

SidG-KOcheckR

CAATAAACTCCTGACACCGGACTTTATG

**Table S3.**  $^1\text{H}$  and  $^{13}\text{C}$  NMR chemical shifts of AMHO measured in  $\text{CD}_3\text{OD}$ . The numbered structure of AMHO is shown for reference.

| Pos. | $\delta_{\text{C}}(\text{CD}_3\text{OD})$ | $\delta_{\text{H}}(\text{CD}_3\text{OD})$ , multi, $J$ , integration |
|------|-------------------------------------------|----------------------------------------------------------------------|
| 1    | 173.6, C                                  | –                                                                    |
| 2    | 55.1, $\text{CH}_3$                       | 3.72, t, $J = 6.4$ Hz, 1H                                            |
| 3    | 29.3, $\text{CH}_2$                       | 1.90-1.78, m, overlap, 2H                                            |
| 4    | 23.7, $\text{CH}_2$                       | 1.88-1.76, m, overlap, 2H                                            |
| 5    | 48.2, $\text{CH}_2$                       | 3.70, t, overlap, 2H                                                 |
| 6    | 169.6, C                                  | –                                                                    |
| 7    | 118.8, CH                                 | 6.38, s, 1H                                                          |
| 8    | 152.8, C                                  | –                                                                    |
| 9    | 37.4, $\text{CH}_2$                       | 2.73, t, $J = 6.6$ Hz, 2H                                            |
| 10   | 61.4, $\text{CH}_2$                       | 3.70, t, overlap, 2H                                                 |
| 11   | 25.3, $\text{CH}_3$                       | 1.94, s, 3H                                                          |

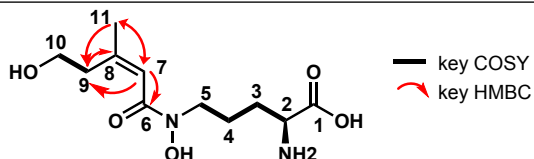

**Table S4.** Amino acid sequences of wild-type SidD protein and other SidD constructs used in this study.

| Name                 | Sequence (5'-3')                                                                                                                                                                                                                                                                                                                                                                                                                                                                                                                                                                                                                                                                                                                                                                                                                                                                                                                                                                                                                                                                                                                                                                                                                                                                                                                                                                                                                                                                                                                                                                                                                                                                                                                                                                                                                                                                                                                                                                                                                                                                                                                                                                                                                                                                                                                                                                     |
|----------------------|--------------------------------------------------------------------------------------------------------------------------------------------------------------------------------------------------------------------------------------------------------------------------------------------------------------------------------------------------------------------------------------------------------------------------------------------------------------------------------------------------------------------------------------------------------------------------------------------------------------------------------------------------------------------------------------------------------------------------------------------------------------------------------------------------------------------------------------------------------------------------------------------------------------------------------------------------------------------------------------------------------------------------------------------------------------------------------------------------------------------------------------------------------------------------------------------------------------------------------------------------------------------------------------------------------------------------------------------------------------------------------------------------------------------------------------------------------------------------------------------------------------------------------------------------------------------------------------------------------------------------------------------------------------------------------------------------------------------------------------------------------------------------------------------------------------------------------------------------------------------------------------------------------------------------------------------------------------------------------------------------------------------------------------------------------------------------------------------------------------------------------------------------------------------------------------------------------------------------------------------------------------------------------------------------------------------------------------------------------------------------------------|
| SidD                 | <p>MASHHHHHHHHTGSIQQDDVHNQIDHCNQSDDLPAARLNCNDVELFEVAGLACDETSSPTGMRDE<br/> MVLLSWLIALLRTRREGGQIRYEWAYRYPEEEPVPRCLAMNEVVAGLQSSVKETAAA VSRHISADVSS<br/> PPAPASLLLSTSSLSQTSDEAKDEGLLHLEIAFENGLCKIRPTWHSNMLPFTVTRYARTLIDTVRLCV<br/> SNCDAAIQDCLRPTAYDLDEIWRWNHNLPTYNFCMHEIISDQAQKFPDKEAIASWDGSLTYRQIDQ<br/> YSSFVARSLIGMGVGLHDVLPVCFEKSRTIVAVLAVMKAGATFVLMPTPLARLQNMAQQVGA<br/> KMMVSSRGQYNLATEIIPNANVLVVEENTFSSLSAEQNGEPLPTVPSSALMYMIFTSGSTGTPKGVKIS<br/> HETYTSSAIPRANAVGYTEDSRVLDFAFYAFDVSIDSMMLTLGNGGCLCIPSDIEDRLNDINGVIRRMK<br/> VNYAGLTPSVARILDADVSSLSGLGLGGEAVSARDVNLWGQDTRIIIGYGPECTIGCTVNSSAATG<br/> RDYISIGPNGAVIWIWDPNDHESLVLGAVGELLVEGPVGGYLNDPEKTA AAFIEDPSWL VAGHE<br/> GYPGRRGRLYKTGDLGRYDPDGGGIVFVGRKDTQVKLRGQVELGEIESQLRRLPSETTVIAEVIV<br/> PQSGGQPTLVAFVAAQTTKGHDHTGLEAAELPDELRRALSEADAELAKVLPYVMVPTAYIPVNHIP<br/> TLISGKTDRKRLRQFGATVDLRQLDQDATNTAARELSDLERRLRQAWSQTLKQACSIRLQDNFFAL<br/> GGDSL TAMKLVSVCRSQGLDLSVTSMFNSPTLSAMASVVRICDQVQRTVPAFSMITSDMNSACVE<br/> AAEPCGVGPADIEDIYPCTPTQESLFTSLKSVKPYVAQRVLCIPSHIDLNAWRKAWEDVVAALPILRT<br/> RVAQLQEPGLQVVLKNSISWTQASDLAEYLENDR TQKMNLG ESLARYAIVEDSADGKRYMVWTI<br/> HHVLYDGWSEPIILKQVSDALQGQPVEVKAQMRDFVRFVDRSDDAAVQEFWRRELKGAVGPQFPRL<br/> PSRDFMPTPDALVERQVSLDTSSGSPFTMATLIRGAWALVASQYTGSDDIVFGETLTGRDIPLPGVESI<br/> VGPLIATVPIRVIRLRGSTVESYLQAVQQSVLARTPYQHLGMQNIRKVSQDAQHACETGTGLVIQPEP<br/> EYVGSSELGVERGDVVLEALHFNPYPLMLACGIRKGGFRVCASFSSLIETRQMERMLAQL ETACWQ<br/> LSQGLSRKVDEISCLPEAELNQIWQWNRSPPLSLDETTSRLRANASTKPGSSYP PAVVPWVCS PRNSS<br/> LLSPIGCVGELWLEGALLSGDTVDS PAWL VAGSSTCAGRTGKVQATGDMVQLREDGSLV FVGRKEN<br/> VVPVQGHAVDITEIERHLAEHLPTIRAAATVVRSSDQELVMFIEQPAEEACIELLSEKREIVCDAP<br/> DKAFQTTICATIPGSLAAVLKCLKDKYMRDSLPSYMAPSAYIVVEKLPNTMDDIDHNL LNQIASQVTPQ<br/> ILNELRDGLSNAWTKATAPNHL SASESILRS AWAKVLRVDPEQIDVDDNFFRRGGDSVLAMKLVSSL<br/> RAQGYSLSVADIFRHMRLSDAARVMKVDERST EKINSYQPF SMLR L P DVQQFLANIVRPQLGDQHW<br/> PIRDVLPVTDSQMDIRATIQQPRTSIQYTMLYFDNSVDRE R LFRSCSDLVKTHEILRTVFISHESFLQ<br/> VVLNELEIPVRAHKTDKLDQYVASLFREDIESNFQLGCPFLRLFYVEGNNGESCLVIGLSHAQYDGV<br/> SLPRLLQDL DALYTGTQLATFSPFSLYMAQTSEEAIQN KAAAYWRNLLSSSSLTLDG PSSDPTDKAIF<br/> HTRPVNIHPLKEITTANLLTAAWAMVLARRLQTPDVTFG SVTSGRTLDPNAENFMGPCYQLTPVRVP<br/> FHPDWTASDLLNFVQTQSAESA AHDFLGFEKIAKLAGWASGRQGFDSIVHHQDWEDFDMMPFGGGS<br/> CRVDIANPHGDAAYPVKAVSFVKEGEIHVGVVGSERDVMFVDEVLGELAAA VVELAGQSTEVLLDS<br/> KLFSGQ*</p> |
| SidD( $\Delta C_T$ ) | <p>MASHHHHHHHHTGSIQQDDVHNQIDHCNQSDDLPAARLNCNDVELFEVAGLACDETSSPTGMRDE<br/> MVLLSWLIALLRTRREGGQIRYEWAYRYPEEEPVPRCLAMNEVVAGLQSSVKETAAA VSRHISADVSS<br/> PPAPASLLLSTSSLSQTSDEAKDEGLLHLEIAFENGLCKIRPTWHSNMLPFTVTRYARTLIDTVRLCV</p>                                                                                                                                                                                                                                                                                                                                                                                                                                                                                                                                                                                                                                                                                                                                                                                                                                                                                                                                                                                                                                                                                                                                                                                                                                                                                                                                                                                                                                                                                                                                                                                                                                                                                                                                                                                                                                                                                                                                                                                                                                                                                                                                                        |

---

SNCDAAIQDCLRPTAYDLDEIWRWNHNLPTYNFCMHEIISDQAQKFPDKEAIASWDGSLTYRQIDQ  
YSSFVARSLIGMGVGLHDVLPVCFEKSRTIVAVLAVMKAGATFVLM DPTLPLARLQNMAQQVGA  
KMMVSSRGQYNLATEIIPNANVLVVEENTFSSLSAEQNGEPLPTVPSSALMYMIFTSGSTGTPKGVKIS  
HETYTSSAIPRANAVGYTEDSRVLD FASYAFDV SIDSM LLLTGNGGCLCIPSD EDR LNDINGVIRRMK  
VNYAGLTPSVARILDADVISSLSGLGLGGEAVSARDVNLWGQDTRIIIGYPCECTIGCTVNSSAATG  
RDYISIGPGNGAVIWIWDPNDHESLVPLGAVGELLVEGPIVGGYLN DPEK TAAAFIEDPSWL VAGHE  
GYPGRRGRLYKTGDLGRYDPDGSGGIVFVGRKDTQVKLRGQ RVELGEIESQLRRLPSETTIVAEVIV  
PQGSGGQPTLVAFVAAQTTKGHDHTGLEAAELPDELRRALSEADAELAKVLP RYMVPTAYIPVNHIP  
TLISGKTDRKRLRQFGATVDLRQLDQDATNTAARELSDLERRLRQAWSQTLK LQAC SIRLQDNFFAL  
GGDSL TAMKLVSVCRSQGLDLSVTSMF SNPTLSAMASVVRICD VDVQRTVPAFSMITS DMNSACVE  
AAEPCGVGPADIEDIYPCTPTQESLFTFSLKSVKPYVAQRVLCIPSHIDLNAWRKAWEDVVAALPILRT  
RVAQLQEPGLQQVVLKNSISWTQASDLAEYLENDRTQKMNLGESLARYAIVEDSADGKRYMVWTI  
HHVLYDGWSEPIILKQVSDALQGPVEVKAQMRDFVRFV RDSDDAAVQEFWRRELKGA VGPQFPRL  
PSRDFMPTDALVERQVSLDTSSGSPFTMATLIRGAWALVASQYTGSDDIVFGETLTGRDIPLPGVESI  
VGPLIATVPIRVIRL RGSTVESYLQAVQQSVLARTPYQHLGMQNI R KVSQDAQHACETGTGLVIQPEP  
EYVGSELGVERGDVVLEALHFNPYPLMLACGIRKGGFRVCASFDS S LIETRQMERMLA QLETACWQ  
LSQGLSRKVDEISCLPEAELNQIWQWNRSPPLSLDETTSR L RANASTKPGSSYPPAVVPWVCS PRNSS  
LLSPIGCVGELWLEGALLSGDTVDS PAWL VAGSSTCAGRTGKVQATGDMVQLREDGSLV FVGRKEN  
VVPVQGHAVDITEIERHLAEHLPTIRAAATVVRSSDQELVMFIEQPA AEEACIELLSEKREIVCDAP  
DKAFQTTICATIPGLAAVLK KLDK YMRDSLPSYMAPSAYIVVEKL PNTMDDIDHNL LNQIASQVTPQ  
ILNELRDGLSNAWTKATAPNHL SASESILRS AWAKVLRVDPEQIDVDDNFFRRGGDSVLAMKLVSSL  
RAQGYSLSVADIFRHMRLSDAARVMKV DERS\*

---

SidD-A<sub>1</sub>T<sub>1</sub>

MASHHHHHHHHTGSIQQDDVHNQIDHCNQSDDLPAARLNCNDVELFEVAGLACDETSSPTGMRDE  
MVL LSWLIALLR TREGGQIRYEWAYRYPEEPPVPRCLAMNEVVAGLQSSVKETAAA VSRHISADVSS  
PPAPASLLLSTSSLSQTSDEAKDEGLLHLEIAFENGLCKIRPTWHSENMLPFTVTRYARTLIDTVRLCV  
SNCDAAIQDCLRPTAYDLDEIWRWNHNLPTYNFCMHEIISDQAQKFPDKEAIASWDGSLTYRQIDQ  
YSSFVARSLIGMGVGLHDVLPVCFEKSRTIVAVLAVMKAGATFVLM DPTLPLARLQNMAQQVGA  
KMMVSSRGQYNLATEIIPNANVLVVEENTFSSLSAEQNGEPLPTVPSSALMYMIFTSGSTGTPKGVKIS  
HETYTSSAIPRANAVGYTEDSRVLD FASYAFDV SIDSM LLLTGNGGCLCIPSD EDR LNDINGVIRRMK  
VNYAGLTPSVARILDADVISSLSGLGLGGEAVSARDVNLWGQDTRIIIGYPCECTIGCTVNSSAATG  
RDYISIGPGNGAVIWIWDPNDHESLVPLGAVGELLVEGPIVGGYLN DPEK TAAAFIEDPSWL VAGHE  
GYPGRRGRLYKTGDLGRYDPDGSGGIVFVGRKDTQVKLRGQ RVELGEIESQLRRLPSETTIVAEVIV  
PQGSGGQPTLVAFVAAQTTKGHDHTGLEAAELPDELRRALSEADAELAKVLP RYMVPTAYIPVNHIP  
TLISGKTDRKRLRQFGATVDLRQLDQDATNTAARELSDLERRLRQAWSQTLK LQAC SIRLQDNFFAL  
GGDSL TAMKLVSVCRSQGLDLSVTSMF SNPTLSAMASVVRICD VDV\*  
RAQGYSLSVADIFRHMRLSDAARVMKV DERS\*

---

SidD-C<sub>2</sub>T<sub>2</sub>

MGSSHHHHHHENLYFQSN DVQRTVPAFSMITS DMNSACVEAAEPCGVGPADIEDIYPCTPTQESLFTF  
SLKSVKPYVAQRVLCIPSHIDLNAWRKAWEDVVAALPILRTRVAQLQEPGLQQVVLKNSISWTQASD

---

---

LAEYLENDRTQKMNLGESLARYAIVEDSADGKRYMVWTIHHVLYDGWSEPIILKQVSDALQGQPVE  
VKAQMRDFVRFVVRDSDDAAVQEFWRRELKGAVGPQFPRLPSRDFMPTPDALVERQVSLDTSSGSPF  
TMATLIRGAWALVASQYTGSDDIVFGETLTGRDIPLPGVESIVGPLIATVPIRVIRILRGSTVESYLQAV  
QQSVLARTPYQHLGMQNIRKVSQDAQHACETGTGLVIQPEPEYVGSELGVERGDVVLEALHFNPPYPL  
MLACGIRKGGFRVCASFSSLIETRQMERMLAQLETACWQLSQGLSRKVDEISCLPEAELNQIWQWN  
RSPPLSLDETTSRRLRANASTKPGSSYPVAVVPWVCSPRNSSLLSPIGCVGELWLEGALSGDVTDSPA  
WLVAGSSTCAGRTGKVQATGDMVQLREDGSLVFVGRKENVVPVQGHAVDITEIERHLAEHLPPTR  
AAATVVRSSDQELVMFIEQPAEEACIELLSEKREIVCDAPDKAFQTTICATIPGSLAAVLKCLDKY  
MRDSLPSYMAPSAYIVVEKLPNTMDDIDHLLNQIASQVTPQILNELRDGLSNAWTKATAPNHLSAS  
ESILRSAWAKVLRVDPEQIDVDDNFRRGGDSVLAMKLVSSLRAQGYSLSVADIFRHMRLSDAARV  
MKVDERS\*

---

SidD-C<sub>T</sub>

MGSSHHHHHENLYFQNSYQPFMRLRLPDVQQFLANIVRPQLGDQHWPIRDVLPVTDSQDMDIRA  
TIQPPRTSIQYTMLYFDNSVDRERLFRSCSDLVKTHEILRTVFISHESFLQVVLNELEIPVRAHKTDKQ  
LDQYVASLFREDIESNFQLGCPFLRLFYVEGNNGESCLVIGLSHAQYDGVSLPRLQLDLDALYTGTLQ  
ATFSPFSLYMAQTSEEAIQNKAAAYWRNLLSSSSLSTLDGPSSDPTDKAIFHTRPVNIHPLKEITTANLL  
TAAWAMVLARRLQTPDVTFGSVTSGRTLDPNAENFMGPCYQLTPVRVPFHPDWTASDLLNFVQTQ  
SAESAHDFLGFEEKIAGWASGRQGFDSIVHHQDWEFDMMPFGGGSCRVDIANPHGDAAYPV  
KAVSFVKEGEIHVGVVGSERDVMFVDEVLGELAAAVVELAGQSTEVLLDSKLFSGQ\*

**Table S5.** Calculated and measured mass values for species detected using intact protein mass spectrometry.

| <b>Species</b>                                                                              | <b>Mass Calculated (Da)</b> | <b>Mass Measured (Da)</b> |
|---------------------------------------------------------------------------------------------|-----------------------------|---------------------------|
| <i>apo</i> -SidD( $\Delta C_T$ )                                                            | 179,930                     | 179,946                   |
| <i>holo</i> -SidD( $\Delta C_T$ )                                                           | 180,610                     | 180,626                   |
| <i>holo</i> -SidD( $\Delta C_T$ )-1xAMHO<br>(Intermediate I)                                | 180,852                     | 180,867                   |
| <i>holo</i> -SidD( $\Delta C_T$ )-4xAMHO-Fe <sup>3+</sup><br>(Intermediate IV)              | 181,631                     | 181,651                   |
| <i>holo</i> -SidD-C <sub>2</sub> dAT <sub>2</sub>                                           | 89,815                      | 89,816                    |
| <i>holo</i> -C <sub>2</sub> dAT <sub>2</sub> -3xAMHO-Fe <sup>3+</sup>                       | 90,594                      | 90,588                    |
| <i>apo</i> -SidD( $\Delta C_T$ , C <sub>2</sub> <sup>0</sup> )                              | 179,864                     | 179,881                   |
| <i>holo</i> -SidD( $\Delta C_T$ , C <sub>2</sub> <sup>0</sup> )                             | 180,544                     | 180,562                   |
| <i>holo</i> -SidD( $\Delta C_T$ , C <sub>2</sub> <sup>0</sup> )-1xAMHO<br>(Intermediate I)  | 180,786                     | 180,806                   |
| <i>holo</i> -SidD( $\Delta C_T$ , C <sub>2</sub> <sup>0</sup> )-2xAMHO<br>(Intermediate II) | 181,028                     | 181,047                   |
| <i>apo</i> -SidD( $\Delta C_T$ , T <sub>1</sub> <sup>0</sup> )                              | 179,914                     | 179,934                   |
| <i>holo</i> -SidD( $\Delta C_T$ , T <sub>1</sub> <sup>0</sup> )                             | 180,254                     | 180,274                   |



## References

1. Lin, H.-C.; Chooi, Y.-H.; Dhingra, S.; Xu, W.; Calvo, A. M.; and Tang, Y. (2013) The fumagillin biosynthetic gene cluster in *Aspergillus fumigatus* encodes a cryptic terpene cyclase involved in the formation of  $\beta$ -*trans*-bergamotene. *J. Am. Chem. Soc.* 135, 12, 4616-4619
2. Liu, N.; Hung, Y.-S.; Gao, S.-S.; Hang, L.; Zou, Y.; Chooi, Y.-H.; and Tang, Y. (2017) Identification and heterologous production of a benzoyl-primed tricarboxylic acid polyketide intermediate from the Zaragozic acid A biosynthetic pathway. *Org. Lett.* 2017, 19, 13, 3560-3563.
3. Eisendle, M.; Schrettl, M.; Kragl, C.; Müller, D.; Illmer, P.; and Haas, H. (2006) The intracellular siderophore ferricrocin is involved in iron storage, oxidative-stress resistance, germination, and sexual development in *Aspergillus nidulans*. *Eukaryot. Cell* 5, 1596-1603.
4. Jalal, M.A.; Love, S.K.; and van der Helm, D. (1986) Siderophore mediated iron(III) uptake in *Gliocladium virens*. 1. Properties of *cis*-fusarinine, *trans*-fusarinine, dimerum acid, and their ferric complexes. *J. Inorg. Biochem.* 24, 417-430.
